# Supplementary material for: Distribution of Glycerophospholipids in the Adult Human Lens
Source: PubMed Central journal article supplement (PMC6315977; doi:10.3390/biom8040156), 2018-11-22
Supplement: biomolecules-08-00156-s001.pdf [file biomolecules-08-00156-s001.pdf]

## Supplementary Material

### Distribution of Glycerophospholipids in the Adult Human Lens

**Jo Ann Seng<sup>1</sup>, Jessica R. Nealon<sup>2,3</sup>, Stephen J. Blanksby<sup>4</sup> and Todd W. Mitchel<sup>2,3\*</sup>**

<sup>1</sup> School of Chemistry, Faculty of Science, Medicine and Health, University of Wollongong, NSW 2522, Australia.

<sup>2</sup> School of Medicine, Faculty of Science, Medicine and Health, University of Wollongong, NSW 2522, Australia.

<sup>3</sup> Illawarra Health and Medical Institute, Wollongong, NSW 2522, Australia.

<sup>4</sup> Central Analytical Research Facility, Institute for Future Environments, Queensland University of Technology, Brisbane, QLD 4000, Australia.

\* Correspondence: toddm@uow.edu.au; Tel.: +61 2 4221 5443

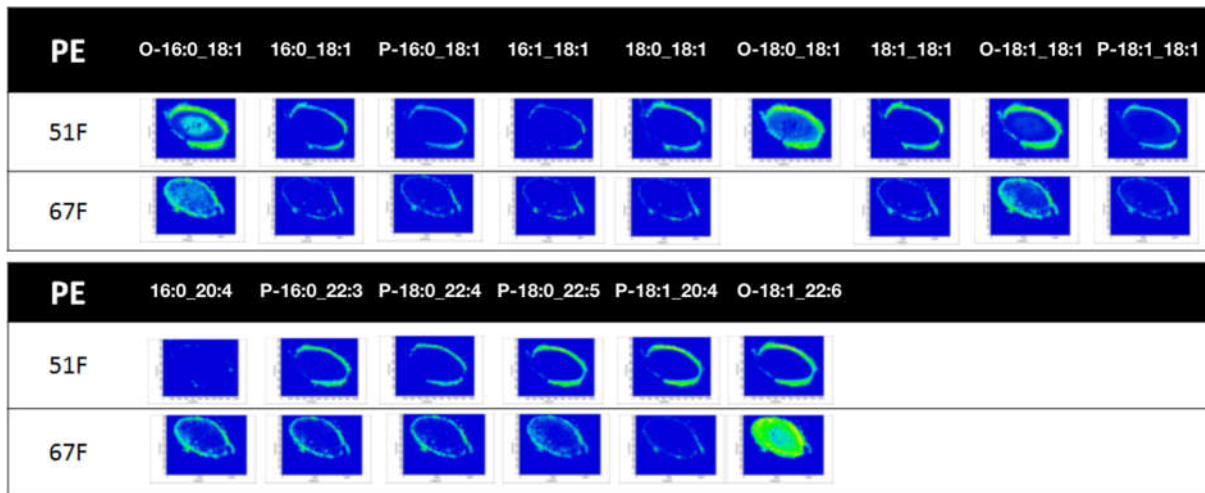

Figure S1: Distribution of all PE species in a 51- and 67-year old human lens.

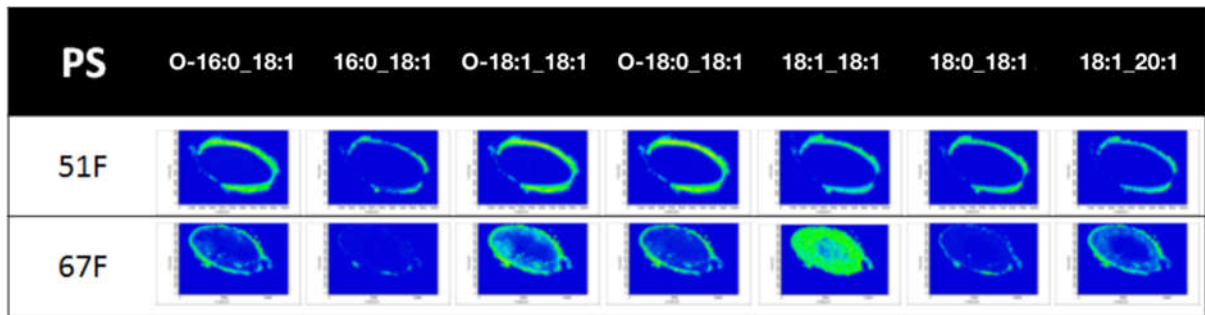

Figure S2: Distribution of all PS species in a 51- and 67-year old human lens.

Table S1: List of lipids detected in  $[M-H]^-$  with  $m/z$  measured experimentally and expected theoretical  $m/z$ . The mass error is shown in ppm.

| Lipid assignment | $m/z$ measured | $m/z$ expected | $\Delta m$ (ppm) |
|------------------|----------------|----------------|------------------|
| PE O-16:0_18:1   | 702.53613      | 702.543767     | 0.99998913       |
| PE 16:0_18:1     | 716.5199       | 716.52303      | 0.999995632      |
| PE P-16:0_18:1   | 700.56293      | 700.52812      | 1.000049691      |
| PE 16:1_18:1     | 714.57379      | 714.50738      | 1.000092945      |
| PE 18:0_18:1     | 744.51642      | 744.55433      | 0.999949084      |
| PE O-18:0_18:1   | 730.56671      | 730.57507      | 0.999988557      |
| PE 18:1_18:1     | 742.53204      | 742.53868      | 0.999991058      |
| PE O-18:1_18:1   | 728.55603      | 728.55942      | 0.999995347      |
| PE P-18:1_18:1   | 726.57587      | 726.54377      | 1.000044182      |
| PE 16:0_20:4     | 738.57941      | 738.50738      | 1.000097535      |
| PE P-16:0_22:3   | 752.55743      | 752.559423     | 0.999997352      |
| PE P-18:0_22:4   | 778.5686       | 778.57507      | 0.99999169       |
| PE P-18:0_22:5   | 776.56927      | 776.55942      | 1.000012684      |
| PE P-18:1_20:4   | 748.54004      | 748.52812      | 1.000015925      |
| PE O-18:1_22:6   | 774.56134      | 774.54377      | 1.000022684      |
| PS O-16:0_18:1   | 746.53186      | 746.53359      | 0.999997683      |
| PS 16:0_18:1     | 760.50745      | 760.51286      | 0.999992886      |
| PS O-18:1_18:1   | 772.54498      | 772.54925      | 0.999994473      |
| PS O-18:0_18:1   | 774.56134      | 774.56489      | 0.999995417      |
| PS 18:1_18:1     | 786.52686      | 786.52851      | 0.999997902      |
| PS 18:0_18:1     | 788.53967      | 788.54416      | 0.999994306      |
| PS 18:1_20:1     | 814.52814      | 814.55981      | 0.99996112       |
| LPE O-16:0       | 438.2962       | 438.29845      | 0.999994867      |
| LPE O-18:0       | 466.30667      | 466.32975      | 0.999950507      |
| LPE O-18:1       | 464.31149      | 464.31425      | 0.999994056      |
| LPE P-18:1       | 462.30154      | 462.29845      | 1.000006684      |
| PA O-16:0_18:1   | 659.49872      | 659.50157      | 0.999995679      |
| PA O-18:0_18:1   | 687.53821      | 687.53287      | 1.000007767      |
